# Supplementary material
Source: bioRxiv or medRxiv preprint supplement (https://www.biorxiv.org/highwire/filestream/56843/field_highwire_adjunct_files/0/150490-1.pdf)
Supplement: Supplementary file [file 150490-1.pdf]

## SUPPLEMENTAL MATERIAL

|                                                                                                          |           |
|----------------------------------------------------------------------------------------------------------|-----------|
| <b>1.0 Experimental cross-contamination: supplemental methods and results</b>                            | <b>2</b>  |
| 1.1 Rotifer clones                                                                                       | 2         |
| 1.2 Design and replication                                                                               | 2         |
| 1.3 Rotifer isolation                                                                                    | 2         |
| 1.4 DNA extraction and sequencing                                                                        | 3         |
| 1.5 Replicability of results                                                                             | 4         |
| <b>2.0 Methods for chromatogram quality analysis</b>                                                     | <b>4</b>  |
| <b>3.0 Contingency table analysis of minority peak ranks (ConTAMPR)</b>                                  | <b>6</b>  |
| 3.1 Multiple sequence alignments                                                                         | 6         |
| 3.2 Peak rank assignments                                                                                | 7         |
| 3.3 Statistical analysis of contingency tables                                                           | 8         |
| <b>4.0 Neighbor-joining phylogeny</b>                                                                    | <b>9</b>  |
| <b>5.0 Supplemental results for samples representing "interspecific DNA transfers"</b>                   | <b>9</b>  |
| 5.1 Sample B11                                                                                           | 9         |
| 5.2 Sample B22                                                                                           | 10        |
| 5.3 Sample B39                                                                                           | 11        |
| 5.4 Samples B14 and B3B1                                                                                 | 12        |
| 5.5 Sample D14                                                                                           | 14        |
| <b>6.0 Methods for pairwise genetic identity and microhomology analyses</b>                              | <b>14</b> |
| 6.1 Pairwise marker alignments to determine homology between species                                     | 15        |
| 6.2 Validation of pairwise homology calculations for wider genomic regions                               | 15        |
| 6.3 Methods for microhomology analysis                                                                   | 16        |
| <b>7.0 Methods for quantitative evaluation of evidence for "intraspecific DNA exchanges"</b>             | <b>18</b> |
| 7.1 Calculating the number of tubes expected to show conspecific DNA contamination                       | 18        |
| 7.2 Minimum numbers of mutations and gene conversions to explain "haplotype trios"                       | 20        |
| <b>Supplemental Figures</b>                                                                              |           |
| <b>S1</b> Minority peak analysis of mtCO1 chromatograms for experimentally contaminated tubes            | <b>26</b> |
| <b>S2</b> Insertion-deletion polymorphisms in ribosomal 28S alignments for six <i>Adineta</i> species    | <b>26</b> |
| <b>S3</b> Summary of minority peaks in mtCO1 chromatograms for Sample B22                                | <b>27</b> |
| <b>S4</b> Summary of minority peaks in 28S chromatograms for Sample B22                                  | <b>27</b> |
| <b>S5</b> Shifted and double peaks in EPIC25 chromatograms for Sample B22                                | <b>28</b> |
| <b>S6</b> Minority peaks in mtCO1 chromatograms for Sample B39                                           | <b>28</b> |
| <b>S7</b> Minority peak distributions indicate extra mtCO1 sequences in Samples B14 and B3B1             | <b>29</b> |
| <b>S8</b> Minority peaks in 28S chromatograms for Sample B14 reveal a second haplotype                   | <b>29</b> |
| <b>S9</b> No elevated microhomology between genes linked to an "interspecific genetic transfer"          | <b>30</b> |
| <b>S10</b> Haplotype trios at Nu1054 and EPIC25 are explained by mutations and gene conversions          | <b>31</b> |
| <b>Supplemental Tables</b>                                                                               |           |
| <b>S1</b> Design and replication of experimental tubes containing two rotifers of different species      | <b>32</b> |
| <b>S2</b> Summary of base calls for tubes experimentally contaminated with heterospecific DNA            | <b>32</b> |
| <b>S3</b> <i>Adineta vaga</i> and Species E share equal genetic identities to Species C at multiple loci | <b>32</b> |
| <b>S4</b> Pairwise homology in <i>A. vaga</i> and Species C for the 10kb genomic region around EPIC25    | <b>33</b> |
| <b>S5</b> Multiple conspecific contamination scenarios can produce cyclical "haplotype trios"            | <b>33</b> |
| <b>S6</b> Probability calculations for heterospecific and conspecific contamination events               | <b>34</b> |

## 2 1.0 Experimental cross-contamination: supplemental methods and results

### 4 1.1 Rotifer clones

6 To test the effect of adding two different animals to one tube, we selected two bdelloid rotifer  
7 clones from our cultures. One is the clone that supplied DNA for the reference genome of *A. vaga*  
8 (Flot et al. 2013), kindly provided by K. Van Doninck in 2013. We believe it was collected originally in  
9 Italy (Mark Welch & Meselson 1998). We call this clone "*A. vaga* (AD008)" or "*A. vaga* (genome)".  
10 The second clone was isolated from *Brachytheceium rutabulum* (Hedwig), growing on *Quercus* sp. at  
11 Silwood Park, Ascot, UK (51° 24' 32.06" N 0° 38' 41.71" W), and kept in continuous culture since  
12 2012-01-09. We call this clone "*A. sp.* (AD006)". According to Debortoli et al. (2016), the most  
13 frequent signatures of "interspecific recombination" were observed between the *A. vaga* "cryptic  
14 species" A and E, and between C and E. These pairs of species share 86.1% and 86.4% sequence  
15 identity respectively at the mtCO1 marker. The identity between AD008 and AD006 at the mtCO1  
16 marker is 86.5%, and thus commensurate with the species pairs involved in potential cross-  
17 contamination. Both clones were cultured using methods described previously (Wilson & Sherman  
18 2010). Every two to three weeks, bdelloid populations were moved to fresh dishes of sterile distilled  
19 water over Czapek-Dox 0% agar (Barron 2004). Cultures were fed with a standardised inoculum of  
20 *Escherichia coli* (OP50), and *Saccharomyces cerevisiae* (S288c).

### 22 1.2 Design and replication

24 We prepared 12 tubes, divided into three groups and replicated as shown in Table S1. Biological  
25 replicates refer to different tubes, technical replicates refer to repeated PCR and sequencing using  
26 the same tube of template DNA. For each of the groups (1X6, 1X8, 2X6-8), one biological replicate  
27 was selected for technical triplication. For the 2X6-8 group, a further two biological replicates were  
28 selected for technical duplication.

### 30 1.3 Rotifer isolation

32 For our experiment, it was critical to be certain of the exact number of rotifers in each tube. The  
33 methods and citations provided by Debortoli et al. (2016) do not describe the technique used to  
34 isolate animals. We requested a protocol from the authors, and were given the following summary:

36 "Our procedure is simple, we collect the lichen/grass patch and put it in Spa® water overnight. The  
37 next day, we isolate the individuals identified as *A. vaga* by pipetting and washing them in clean  
38 water drops (serial dilutions). We then carefully checked under the binocular each tube to make sure  
39 that only one individual was present." (N. Debortoli and K. Van Doninck, pers. comm.)

40

41 This description raised some technical concerns for us. Prior to 2014, we had employed a similar  
42 procedure, but we found that pipettes were unsuitable for systematic isolation of individuals from  
43 nature, and that quality control procedures requiring visual inspection of Eppendorf tubes were  
44 inherently unreliable. Bdelloid rotifers are tiny, transparent and often rest motionless and invisible  
45 under the distortion of a meniscus or against the plastic base of a tube. They frequently stick inside  
46 pipette tips and are very difficult to dislodge or even to see. This leads to lost time and plasticware,  
47 and more seriously, to loss of specimens and bias in the subset of animals that successfully pass  
48 through the protocol. We occasionally experienced contamination via the following events. An  
49 individual is serially washed and deposited into a tube by pipette. The tube is carefully checked  
50 under the binocular microscope, but no animal is detected. It is assumed that the specimen was  
51 stuck in the pipette tip, but this cannot be directly verified. The tip is changed, and a second rotifer  
52 is serially washed and placed in the tube. This time, when the tube is carefully checked, a rotifer is  
53 visually confirmed, and the tube is sealed for DNA extraction. In fact, the first animal also entered  
54 the tube, but was hidden under the meniscus or on the bottom; thus, two rotifers now share one  
55 tube. This is not a particular problem when isolating animals from a clonal culture, but becomes a  
56 critical technical issue when isolating genetically different animals from nature. Opportunities for  
57 contamination increase when large numbers of animals must be isolated.

58

59 To address these problems, we now use a needle-based protocol when isolating individuals. This  
60 protocol is described in Additional File 1, and was used to prepare experimentally cross-  
61 contaminated samples. Into each of the 12 experimental tubes, 8µL of sterile Milli-Q water was  
62 pipetted. To each tube in groups 1X6 and 2X6-8, the needle protocol was used to move a single  
63 rotifer from a stock culture of *A. sp.* (AD006), via a wash droplet of 1mL sterile Milli-Q water. To  
64 each tube in groups 1X8 and 2X6-8, a single rotifer was moved from a stock culture belonging to *A.*  
65 *vaga* (AD008). The tubes in group 2X6-8 therefore contained two rotifers, one from each species.

66

#### 67 **1.4 DNA extraction and sequencing**

68

69 We extracted DNA from the samples and amplified the mitochondrial cytochrome oxidase I (mtCO1)  
70 marker by PCR using the methods described by Debortoli et al. (2016). We used the same primers  
71 (LCO1 and HCO1; Folmer et al. 1994) at the same concentrations, and the same concentration of  
72 template in the same reaction volume (25µL). Amplifications were performed using GE Healthcare  
73 illustra™ PuReTaq Ready-To-Go PCR Beads. PCR products were purified, and sequenced in both  
74 directions with the same primers using an ABI 3730xl DNA Analyzer (Applied Biosystems), via a  
75 commercial Sanger sequencing service (Macrogen Europe, Amsterdam, The Netherlands).

76

## 77 **1.5 Replicability of results**

78

79 Technical replicates within the 2X6-8 group were concordant and the same clone always dominated  
80 the amplicon pool, but biological replicates showed different dominant clones (Table S2). For three  
81 samples, *A. vaga* (AD008) supplied the majority haplotype (99.5%, 99.3% and 99.6% of bases called);  
82 for the other three samples, *A. sp.* (AD006) was in the majority (99.6%, 99.7%, 97.9%). Concordance  
83 among technical replicates suggests that small differences in efficiency of lysis or DNA extraction are  
84 at least as important as differences during PCR in determining which of the genomes is amplified.  
85 Consequently, it may not be surprising to see a consistent majority sequence when amplifying  
86 repeatedly from the same sample, even if it contained multiple animals. The discordance among  
87 biological replicates suggests that the direction of the bias may be inconsistent between samples,  
88 even when the same two species are involved.

89

90 Figure 1 presented results from bidirectional pairs of sequencing chromatograms for Samples  
91 1X6\_01a and 2X6-8\_03a, where *A. sp.* (AD006) was in the majority and *A. vaga* (AD008) in the  
92 minority. To check robustness in the reciprocal case, we repeated the analysis for Samples 1X8\_02c  
93 and 2X6-8-05a, where *A. vaga* (AD008) was in the majority. The outcomes were as expected (Figure  
94 S1). Again, the minority peaks for AD008 often were hidden within noise associated with  
95 polymerase slippage and other errors, but the contaminant was recovered via ConTAMPR.

96

## 97 **2.0 Methods for chromatogram quality analysis**

98

99 Sequencing chromatograms for our experimental samples were returned by Macrogen Europe in the  
100 ABIF format, which included phred quality scores (Ewing & Green 1998). Chromatogram files were  
101 provided by Debortoli et al. in the .scf file format. We used CodonCode Aligner (v. 7.0.1, CodonCode

102 Corporation) to assign phred quality scores to these chromatograms, which were imported for  
103 further processing in Geneious (v. 8.1.9, Biomatters Ltd, Auckland, New Zealand; Kearse et al. 2012).

104  
105 Chromatograms for mtCO1 were uniformly trimmed to 605bp to avoid sequencing artefacts near the  
106 priming sites, and phred Q20 quality scores are reported for this section. The boxplots shown in  
107 Figures 4 and 5 were produced using R (v. 3.3.1, R Core Team) with the default setting for whisker  
108 length, and annotated manually. The two distributions were plotted separately in Figure 5 because  
109 they were statistically different. Owing to obvious outliers, distributions of quality scores for the  
110 chromatograms of Debortoli et al. (2016) were not assumed to be normal, and were compared using  
111 the Mann-Whitney test, implemented in R through the "wilcox.test" function. The equivalent  
112 distributions for our new data were approximately normal, but the difference between groups was  
113 not significant whether analysed using a parametric (N=38,  $t=1.13$ ,  $P = 0.26$ ) or nonparametric  
114 approach (N=38, Mann-Whitney  $W=234$ ,  $P=0.1186$ ).

115  
116 The 28S ribosomal marker was amplified by Debortoli et al. in four overlapping fragments. This locus  
117 is highly conserved among even distantly related species. We restricted all our analyses to the first  
118 fragment, amplified with the primers 28S0FCT and 28S1RCT (Debortoli et al. 2016). Among the six  
119 *Adineta* species reported by Debortoli et al (2016), this fragment has 70 variable sites in 700bp  
120 (10%), whereas only 24 variable sites are found in the remaining 1610bp (1.5%). We trimmed  
121 chromatograms to a uniform length of 659bp (28S0FCT) or 666bp (28S1RCT) and calculated phred  
122 quality scores for this informative region. We focused on the Q40 phred score because the overall  
123 quality of 28S chromatograms was higher than for mtCO1; we suggest that the whole-genome  
124 amplification step tended to increase the representation of a single template and reduced or  
125 eliminated competing signals, especially after further PCR.

126  
127 The distribution of 28S quality scores was shifted significantly lower for samples where HGT was  
128 claimed (Figure 5, Mann-Whitney Test: N=122,  $W=373.5$ ,  $P=0.015$ ). Both the median and second-  
129 highest quartile of the "HGT" samples fall within the second-lowest quartile of the "non-HGT"  
130 samples. The HGT group also had significantly more files with scores below 80% (Fisher's Exact Test,  
131 4 in 12 versus 2 in 121,  $P=0.0006$ ; or if we treat paired chromatograms from the same sample as  
132 non-independent, 2 in 6 versus 1 in 60,  $P=0.019$ ).

133  
134 No attempt was made to assess quality scores for EPIC25 chromatograms, because even if DNA all  
135 comes from a single animal, these amplicons represent a pair of homologous intronic regions that

136 frequently are separated by at least one insertion-deletion polymorphism (indel), which means two  
137 sets of peaks are superimposed out-of-phase in some regions (Debortoli et al. 2016), rendering  
138 quality scores uninformative.

139

### 140 **3.0 Contingency table analysis of minority peak ranks (ConTAMPR)**

141

#### 142 **3.1 Multiple sequence alignments**

143

144 The sequences of all haplotypes delimited by Debortoli et al. (2016) were retrieved from GenBank  
145 (KU860573–KU861170), along with relevant sequences for the *A. vaga* reference clone (GQ398061;  
146 JX184001), *A. ricciae* (EF173187; KM043216) and *A. sp.* AD006 (KM043183). Multiple alignment of  
147 chromatograms and candidate sequences was performed using MAFFT v. 7.017 (Katoh et al. 2009),  
148 implemented in Geneious using the MAFFT plugin (v. 1.3.3). For some sequences, particularly  
149 mtCO1, this algorithm alone was sufficient to bring peaks for the majority and putative minority  
150 sequences into alignment with the reference haplotypes. This is because there are no indels  
151 between species for the mtCO1 marker, so peaks corresponding to amplicons from different  
152 templates are superimposed ('in-phase'), though we typically saw slight displacement of minority  
153 peaks by less than a base-width in one direction or another relative to the majority peak. This is  
154 illustrated in Additional File 2, using annotated screenshots from the visual interface of Geneious.

155

156 For 28S rDNA, a multiple alignment of all unique sequences for *A. vaga* Species A-F revealed three  
157 indels of 1-2bp within a single 100bp region of the focal first fragment (Figure S2). This occasionally  
158 created challenges in testing whether two sequences from different species were present in an  
159 amplicon population. For instance, Sample B14 was predicted to include haplotypes from Species A  
160 and E. There is a single 1bp indel between these species (at position 134 in Figure S2), which means  
161 the minority peaks in a forward chromatogram are predicted to run approximately in-phase with the  
162 majority peaks until the indel, then become misaligned by 1bp, whereas the minority peaks in a  
163 reverse chromatogram will show the opposite pattern. The contaminant might thus be mistaken for  
164 a polymerase slippage artefact (Mullis et al. 1994). To analyse such a pattern, it is necessary to  
165 manually shift the alignment of each chromatogram by 1bp around the indel, which means the  
166 majority peaks are out of phase with the aligned majority haplotype for part of its length. This  
167 alignment shift is illustrated in Additional File 3. For clarity, we point out every base corresponding  
168 to the minority Species E haplotype in both directions. The pattern of multiple peaks changes

169 exactly as predicted at the site of the 1bp indel between Species A and Species E, which thus  
170 represents further, sequence-independent evidence for the additional haplotype.

171

172 EPIC25 is a highly variable intronic marker with multiple indels of up to 12bp within and 23bp  
173 between *A. vaga* Species A-F. Superimposed sequences from different species are therefore  
174 displaced even further and more frequently than at 28S, which makes it challenging to align even  
175 one candidate haplotype to the minority peaks. Multiple manual adjustments to an initial MAFFT  
176 alignment were necessary to follow the minority haplotype after each indel. It would not be feasible  
177 to attempt to align haplotypes from more than two candidate species at once against these  
178 chromatograms, since the peaks and variable sites would almost never be predicted to coincide with  
179 both candidates. However, it was not necessary to align every species individually to test for the  
180 EPIC25 sequences listed in Table 1, because the predicted matches were so clear and the alignment  
181 constraints made a match to any alternative haplotype so improbable. Additional File 4 illustrates  
182 the alignment shifts necessary to follow a minority Species A haplotype running alongside a Species  
183 E haplotype with at least 5 dispersed indels of varying lengths. Each peak we interpret as  
184 corresponding to the minority haplotype is individually highlighted.

185

### 186 **3.2 Peak rank assignments**

187

188 After bidirectional pairs of chromatograms had been aligned with candidate sequences, we manually  
189 scored the relative heights of minority fluorescence peaks at each site where a candidate sequence  
190 differed from the majority haplotype. We examined the trace lines corresponding to the remaining  
191 three nucleotides. Where these formed clear peaks, we assigned ranks 2, 3 and 4 based on their  
192 relative heights, and recorded the rank corresponding to the required base for each candidate  
193 sequence. The absolute heights were not considered, because we determined experimentally that  
194 peaks corresponding to a known second animal may be very small, inconsistent or even absent  
195 (Figure 1). Where two peaks appeared equal in height, we increased the magnification of the  
196 chromatogram using the Geneious interface until a difference, however small, became clear. If no  
197 such difference was apparent, the available ranks were randomly assigned to the two peaks.

198

199 When the minority sequence was 1bp out of phase with the majority haplotype, minority bases  
200 sometimes did not correspond to distinct peaks, but produced either a trailing or a leading 'tail'  
201 attached to the preceding or succeeding peak. In these cases, there was usually a local maximum or  
202 at least an inflection point which we took as the height of the peak. If a base did not correspond to a

203 clear peak, local maximum or inflection point, we estimated the mean relative heights of the trace  
204 lines at that site, regardless of shape. Where the trace line for a nucleotide showed absolutely no  
205 signal at a site, we recorded rank "5" to indicate this feature, but treated it as a fourth-ranked peak  
206 call for the purpose of analysis. Very rarely, the trace lines for two nucleotides both were flat, with  
207 no fluorescence signal. In these cases, the two missing nucleotides were each annotated as "6", and  
208 these were later split equally between ranks 3 and 4 for analysis.

209

210 At a locus like mtCO1, where all sequences are 'in-phase', the majority peak by definition cannot be  
211 called to represent a minority variant. However, Additional Files 3 and 4 illustrate a complication  
212 that occurs when majority and minority peaks are not aligned in phase, as at 28S and EPIC25.  
213 Sometimes, the expected minority peak at a variable site will happen to match the out-of-phase  
214 majority peak. This is a pure coincidence, but it prevents an assessment of how high the predicted  
215 secondary peak would have been otherwise, and it is not trivial to predict how often this is expected  
216 to happen under the null hypothesis. Where the "minority" haplotype happened to match a shifted  
217 majority peak, we recorded "1" as the rank, and we took a conservative approach and simply  
218 excluded all of these first-ranked "minority" calls from contingency analyses.

219

### 220 **3.3 Statistical analysis of contingency tables**

221

222 If minority peaks are a consequence of noise, non-rotifer contaminants, polymerase slippage or  
223 other sequencing artefacts, then all else being equal we predicted that the peak ranks corresponding  
224 to any control rotifer sequence would not differ significantly from an equal distribution (i.e. a 1:1:1  
225 ratio for second, third and fourth-ranked peaks). We validated this prediction using chromatograms  
226 from our "1X" experimental groups (e.g. Figure S1). Alternatively, if a second haplotype is present,  
227 the set of peaks corresponding to that haplotype ought to differ significantly from the null  
228 distribution, showing a significant bias in favor of second- rather than third-ranked peaks, and third-  
229 rather than fourth-ranked peaks. For each candidate haplotype, we tested whether the peak rank  
230 distribution differed significantly from the null hypothesis of a 1:1:1 ratio, using Pearson's Chi-  
231 squared test for count data (Agresti 2007), implemented in R via the "chisq.test" function.

232

233 In many cases, more than one alternative sequence produced a significant deviation from the null  
234 distribution. This is expected, because at many variable sites an alternative base is shared by more  
235 than one rotifer species; therefore, the true matching sequence will 'drag up' the rank distribution of  
236 species that share bases. For example, in Figure 1B, the *A. ricciae* control sequence deviates from the



237 null expectation ( $\chi^2=64.9$ , d.f. =2,  $P = 8.07 \times 10^{-15}$ ), but only because it shares some variants with the  
238 true contaminant: *A. sp.* (AD006). Excluding these shared sites abolishes the fit ( $\chi^2= 3.2$ , d.f. = 2,  
239  $P=0.202$ ). Figure 3 further illustrates the effect of relatedness. To distinguish the primary match, we  
240 compared the degree of fit not only against the null distribution, but among different candidate  
241 species. We typically used the Chi-square test of independence for a 3 x n contingency table, where  
242 n is the number of candidate species or haplotypes. If the initial table included cell counts too small  
243 to meet the assumptions of the test, two or more control species were pooled. Table 1 indicates the  
244 species or haplotypes that were used for each comparison; distributions that were pooled are  
245 indicated with "&". In some cases, further pairwise contrasts are reported in the text. To correct for  
246 the problem of multiple comparisons,  $\alpha$  was adjusted using the Bonferroni correction, but all  
247 hypothesis tests remained significant even using this highly conservative approach.

248

#### 249 **4.0 Neighbor-joining phylogeny**

250

251 The phylogenetic tree in Figure 3 was constructed using the neighbor-joining method implemented  
252 in the Geneious Tree Builder tool, with the default settings and 100 bootstrap replicates.

253

#### 254 **5.0 Supplemental results for samples claimed to be cases of interspecific DNA transfer**

255

256 Analysis of chromatograms for the six apparently incongruent samples indicated that some  
257 contained DNA from more than one animal, while others contained the predicted "original copies"  
258 of genes that had supposedly been replaced via interspecific horizontal genetic transfer. The results  
259 are summarised in Table 1, and this section discusses each of the samples in greater detail.

260

##### 261 **5.1 Sample B11**

262

263 To test the hypothesis of cross-contamination for Sample B11, it was necessary to predict which 28S  
264 and mtCO1 haplotypes a putative second animal from Species E might have. We consulted Table S3  
265 of Debortoli et al. (2016), and found that only Individual 81 [E] shares all the Species E haplotypes  
266 that feature incongruently in Sample B11. We therefore aligned the B11 chromatograms to the  
267 haplotypes of that individual: Hap31 [E] at mtCO1, and Hap13 [E] at 28S. The choice of control  
268 haplotypes to represent each of the other species (Figure 2) was random. Peak rank distributions for  
269 the six control species were statistically indistinguishable from each other ( $\chi^2=6.66$ , d.f. = 10,  $P =$   
270 0.76), and only differed from the null expectation because each happened to share some bases with

271 Hap31 [E]. For example, if we exclude polymorphisms *A. ricciae* shares with Hap31 [E], it no longer  
272 differs from an equal ratio of second, third and fourth peaks (30:40:26;  $\chi^2=3.25$ , d.f. = 2, P = 0.197).

273

274 Although ConTAMPR revealed additional mtCO1 and 28S haplotypes for Sample B11 (Figure 2; Table  
275 1; Additional File 2), the corresponding chromatograms are not obvious outliers in terms of phred  
276 quality scores (Figure 4; Figure 5). At 28S, for instance, both chromatograms for Sample B11 lie  
277 within the interquartile range for samples where no HGT is claimed. This is consistent with the  
278 results of our experiments: even when multiple animals are present, we do not necessarily see  
279 obvious differences in chromatogram quality, since minority peaks may be very small, or absent.

280

281 If Sample B11 contained two animals, it is interesting that the majority haplotypes for mtCO1 and  
282 28S were from Species A, whereas those at EPIC25, EPIC63 and Nu1054 were from Species E. This  
283 may simply reflect the chance outcome of two consecutive nonlinear amplifications (WGA and PCR).  
284 However, the guanine-cytosine (GC) content of the Species A haplotypes expected at EPIC25, EPIC63  
285 and Nu1054 is much higher than the corresponding Species E haplotypes that Debortoli et al.  
286 recovered (+17.7%, +13.6%, +21.2% respectively), whereas GC differences were much lower at  
287 mtCO1 and 28S (+1.9%). The whole-genome amplification kit used by Debortoli et al. has been  
288 found to show a bias in favor of templates with lower GC content (Han et al. 2012), and multi-  
289 template PCR also is sensitive to this parameter (Polz & Cavanaugh 1998). Substantial differences in  
290 GC content may have helped to skew amplification of the competing haplotypes, effectively masking  
291 Species A at EPIC25, EPIC63 and Nu1054. At mtCO1 and 28S, GC was not substantially different, and  
292 the identities of both animals were recovered via ConTAMPR, though their representation was far  
293 from equal. Owing to effects like this, absence of evidence is not evidence of absence when  
294 considering amplicons from potentially contaminated samples. Even if two animals are present, one  
295 may be masked by the other at certain loci or in certain amplifications. It is very difficult to exclude  
296 the hypothesis of contamination on the basis of apparently clean chromatograms, but it is  
297 immediately telling to discover an extra haplotype.

298

## 299 **5.2 Sample B22**

300

301 The predicted donor of the incongruent EPIC25 haplotype in "Individual 58" was Species E. In  
302 animals of this species, Table S3 of Debortoli et al. (2016) shows that EPIC25 Hap37 [E] occurs with  
303 mtCO1 Hap29 [E] and 28S Hap16 [E]. For ConTAMPR, we therefore aligned the B22 mtCO1 and 28S  
304 chromatograms against these candidates, along with control sequences from other species. Again,

305 we found evidence for the predicted haplotypes (Figure S3, Figure S4). The extra 28S haplotype in  
306 Sample B22 was sufficiently prominent that the phred quality scores for these chromatograms fell  
307 outside the range of values for samples where no HGT was claimed (Figure 5).

308

309 We examined chromatograms for Sample B22 at the EPIC25 marker itself, where the authors  
310 reported a single, incongruent haplotype: Hap37 [E]. We did not find evidence for an expected  
311 'native' Species C sequence. We suggest this haplotype was lost either during PCR or WGA, perhaps  
312 in part because its GC content would have been approximately 22% higher than Hap37 [E].

313

314 The authors characterised "Individual 58" as "homozygous" at EPIC25. However, it is clear from the  
315 data that a second Species E haplotype also was present in Sample B22. The trace files show  
316 hundreds of double and triple peaks of comparable heights. As discussed above, these represent  
317 two genomic homologs, running slightly out of phase following an indel, and with triple peaks  
318 indicating further single nucleotide polymorphisms (SNPs) between them. There are at least 7 SNPs  
319 between Hap37 [E] and the other haplotype in Sample B22, along with the indels. Many of these  
320 appear to correspond to standing polymorphisms shared by other animals in the Species E  
321 population (Figure S5). The presence of two quite divergent "transferred" haplotypes in a putative  
322 recipient individual is important. It is not consistent with the HGT scenario posited by Debortoli et  
323 al. (2016), in which interspecific recombination replaced the original DNA at one site, and "gene  
324 conversion promptly copied the integrated DNA on its homologous region". That would produce  
325 two identical haplotypes in the recipient. It would not preserve various SNPs and indels found in a  
326 "heterozygous" donor. On the other hand, this pattern is predicted if the haplotypes arose from a  
327 contaminating animal belonging to Species E, which had heterozygous combinations at EPIC25  
328 similar to those seen in Individuals 81 (Hprim14a/b) and 78 (B39a/b). This is an independent line of  
329 evidence for the conclusions supported by ConTAMPR at 28S and mtCO1.

330

### 331 **5.3 Sample B39**

332

333 Debortoli et al. (2016) interpreted Sample B39 as Individual 66 [E]. A Species E mtCO1 haplotype  
334 had been replaced, in their view, by one imported from Species C. An alternative hypothesis is that  
335 Sample B39 was cross-contaminated with some DNA from Species C, which happened to be  
336 amplified by the mtCO1 primers instead of the native sequence. This hypothesis predicts a Species E  
337 haplotype congruent with the other loci among the minority mtCO1 amplicons. Specifically, Table S3  
338 of Debortoli et al. (2016) indicates that Individual 66 ought to have mtCO1 Hap31 [E], as seen in

339 Individual 81. Like Individual 66, that animal had Hap16 [E] at 28S, Hap16 [E] at EPIC63, Hap19 [E] at  
340 Nu1054 and Hap30 [E] at EPIC25. No other individual had such a combination.

341

342 We used ConTAMPR to test whether minority peaks might correspond to Species E rather than any  
343 other species, and also to Hap31 [E] rather than any other Species E mtCO1 haplotype. We aligned  
344 B39 chromatograms not only to other *Adineta* species, but to seven diverse haplotypes from Species  
345 E. We found strong and specific evidence for the 'missing' native mtCO1 haplotype predicted for  
346 Individual 66 (Figure S6). This result brings all five loci into concordance without the need to invoke  
347 interspecific horizontal genetic transfer or transformation of mtDNA, which is problematic in itself  
348 (Larosa & Remacle 2013). The only incongruence in Sample B39 is the presence of mtCO1 Hap 10 [C]  
349 among the amplicons. We attribute this either to chance amplification from loose Species C mtDNA  
350 associated with the surface or gut of Individual 66, or to a second animal whose nuclear sequences  
351 were dropped or outcompeted during WGA or PCR, as seen with samples B11 and B22.

352

#### 353 **5.4 Samples B14 and B3B1**

354

355 For samples B14 and B3B1, the minority peaks in mtCO1 chromatograms were a significantly better  
356 match to several other bdelloid mtCO1 haplotypes than the null expectation. This is consistent with  
357 the presence of additional mtCO1 sequences, and therefore DNA from additional animals in these  
358 samples (Figure S7). However, the peak rank distributions for several candidate species could not be  
359 distinguished statistically when compared with each other.

360

361 Looking at other loci, we noticed that B14 and B3B1 were the only samples to show unambiguous  
362 evidence of haplotypes originating from at least three different species (in each case, A, C and E;  
363 Table 1). We guessed that we were unable to identify a single consistent secondary sequence at  
364 mtCO1 because three animals from quite different species had contributed DNA to these samples.  
365 This hypothesis was supported by the fact that mtCO1 chromatograms from these two samples were  
366 extreme outliers in quality (Figure 4). The presence of DNA from three animals would explain why  
367 additional mtCO1 haplotypes cannot be narrowed down to a single candidate. Relative to the subtle  
368 minority peaks produced when we added just one extra animal (Figure 1B), the noise is such that  
369 almost any *Adineta* haplotype could be present. The hypothesis of "interspecific horizontal genetic  
370 transfers" supplies no obvious explanation for the unusual features of the mtCO1 amplicons  
371 obtained from these particular samples.

372

373 For Sample B14, we found evidence of an additional haplotype at 28S, consistent with Species E and  
374 a better match by a significant margin than more distantly related species (Figure S8). This suggests  
375 that one of the additional animals belonged to Species E, which would explain the incongruent  
376 Species E haplotypes Debortoli et al. (2016) found at EPIC63 (Table 1). Peaks corresponding to this  
377 additional haplotype also explain the unusually low phred quality scores for the 28S chromatograms  
378 for Sample B14 (Figure 5). These peaks are annotated fully in Additional File 3. The absolute heights  
379 of secondary peaks were often very low, as we saw at mtCO1 when we deliberately added two  
380 animals. At 28S, this may reflect preferential nonlinear amplification of one haplotype during both  
381 WGA and PCR. This would explain why some of the other contaminated samples (e.g. B11) did not  
382 show obviously anomalous 28S quality scores, or sometimes any detectable second 28S haplotype  
383 (e.g. B3B1). Conversely, no horizontal exchange was claimed for Sample A3B1 ("Individual 56" [C]),  
384 yet it was another clear outlier in Figure 5. We were not provided with mtCO1 or EPIC25  
385 chromatograms for Sample A3B1, but the evidence from 28S suggests that DNA from a second  
386 animal was present. Perhaps no interspecific recombination was claimed because the same animal's  
387 sequence happened to be in the majority at all loci. The true incidence of interspecific cross-  
388 contamination is likely to be higher than the six samples where incongruence was noted.

389

390 For Sample B14, we found evidence of an additional EPIC25 haplotype consistent with Species E,  
391 even though two EPIC25 haplotypes from Species C had already been reported by Debortoli et al.  
392 The match was significantly better than the null expectation ( $\chi^2=11.18$ , d.f. = 2, P = 0.00374). The  
393 presence of a third EPIC25 haplotype in a single sample is suggestive regardless of its identity, since  
394 no single animal in the study of Debortoli et al. had more than two copies of this marker. Only one  
395 chromatogram was provided (for the primer EPIC25F), and without the guidance of bidirectional  
396 reads for this variable and indel-rich marker, we did not attempt to align other species.

397

398 Debortoli et al. reported just one EPIC25 haplotype for Sample B3B1, matching Species E. However,  
399 we found evidence of at least one and possibly two further EPIC25 haplotypes uniquely matching  
400 Species C (Table 1). The fit was significantly better than the null expectation ( $\chi^2=108.44$ , d.f. = 2, P <  
401  $2.2 \times 10^{-16}$ ); indeed, given the indel issues discussed above, no other species could be aligned to the  
402 minority peaks. The model of interspecific recombination and gene conversion offered by Debortoli  
403 et al. has difficulty accommodating two different non-native sequences at one locus, in addition to  
404 the more serious obstacles we report elsewhere. The 'native' EPIC25 sequence we would predict for  
405 Species A was not recovered; we suggest it was dropped during WGA or PCR. At the noisy mtCO1  
406 locus, Species C again showed the strongest evidence of a fit to minority peaks (Figure S7,  $\chi^2=12.9$ ,

407 d.f. = 2, P = 0.00158), though the fit to Species E also differed significantly from the null expectation  
408 ( $\chi^2=7.35$ , d.f. = 2, P = 0.0254). This evidence points to Species C as one of the contaminants. Our  
409 interpretation is that Sample B3B1 contained animals or loose DNA belonging to Species A, C and E.

410

#### 411 **5.5 Sample D14**

412

413 Debortoli et al. (2016) interpreted Sample D14 as "Individual 5", and inferred that a Species A EPIC25  
414 sequence had been replaced by Hap10 from Species C. If the incongruent sequence instead came  
415 from a second animal or contaminant DNA from Species C, then a native Species A sequence is  
416 expected among the amplicons. Table S3 of Debortoli et al. (2016) predicts either Hap1 or Hap4 [A].  
417 In the chromatograms, Hap10 [C] is in the majority, but in both directions a second sequence with  
418 peaks of almost equal height runs several base pairs out of phase, as expected if indels are present.  
419 It corresponds exactly to Hap4 [A], with a specific number of GAA tandem repeats to distinguish it  
420 from Hap1 [A]. Additional File 4 shows these aligned chromatograms, pointing out peaks matching  
421 the second sequence, and highlighting sites where it differs from the Hap 10 [C] interpretation. It  
422 was not necessary to attempt to align all the other *Adineta* species to these chromatograms and  
423 compare peak heights, as EPIC25 is so variable that no other species would match. Almost all base  
424 calls for Hap4 [A] use either first or second-ranked peaks, and no fourth-ranked peaks are needed at  
425 all. The probability of this happening by chance is negligible ( $\chi^2=75.97$ , d.f. = 2, P < 2.2 x 10<sup>-16</sup>). The  
426 most parsimonious interpretation is that Individual 5 had concordant Species A haplotypes at all loci  
427 in the expected combinations, but its sample tube (D14) was contaminated by DNA from Species C,  
428 bearing an EPIC25 haplotype that was amplified by WGA and PCR along with the native haplotype.

429

430 As discussed in the text, Debortoli and colleagues supplied two separate bidirectional pairs of EPIC25  
431 chromatograms for Sample D14. Each pair represented an independent PCR amplification from the  
432 same DNA sample following WGA (N. Debortoli, pers. comm.). In one chromatogram pair, discussed  
433 above, the expected Species A sequence was unambiguous. Importantly, however, this native  
434 sequence was absent from the second pair of chromatograms, even as minor secondary peaks  
435 (Additional File 4). Even on close scrutiny, only the incongruent sequence from Species C was visible.  
436 Clearly, the DNA in the template tube had not changed from one PCR to the next; therefore, the  
437 inconsistency arose from complete loss of a haplotype during the dynamics of multi-template PCR.

438

#### 439 **6.0 Pairwise genetic identity and microhomology analyses**

440

441 **6.1 Pairwise marker alignments to determine homology between species**

442

443 To determine pairwise homology between sequences involved in “interspecific recombination”, we  
444 aligned the putative donor and recipient haplotypes in each case as described above using the  
445 MAFFT v. 7.017 algorithm (Kato et al. 2009), implemented via the Geneious plugin (v. 1.3.3) with  
446 default settings. We then recorded the pairwise identity for each alignment and the GC content of  
447 each sequence, as reported in the Geneious "Statistics" interface.

448

449 **6.2 Validation of pairwise homology calculations for wider genomic regions**

450

451 The genetic distances in Table 2 are estimated for short (<1kb) markers that Debortoli et al. (2016)  
452 selected for easy amplification. However, horizontal transfer events are claimed to extend several  
453 kilobases beyond the markers they encompass (Figure 5 of Debortoli et al. 2016). We considered  
454 the possibility that genomic regions beyond the focal markers might show substantially greater  
455 sequence homology between species, thereby decreasing the mechanistic implausibility of HGT. For  
456 example, the EPIC25 marker (ca. 400bp) spans the first intron of a gene approximately 4.3kb long,  
457 encoding a product with similarity to the vertebrate metastasis suppressor protein 1 (MTSS1). In the  
458 *A. vaga* reference genome (Flot et al. 2013), the next-closest gene is approximately 2kb from the  
459 marker in a 5' direction, and encodes a product with similarity to vertebrate trifunctional enzyme  
460 subunit beta (HADBH). Because introns are often highly variable, pairwise identity at the EPIC25  
461 marker might underestimate the homology between two species for the shared genes in this region.

462

463 We tested this hypothesis for the "interspecific recombination" event inferred from Individual 58  
464 (Sample B22), in which EPIC25 Hap10 [C] was putatively replaced by Hap37 [E]. At the marker itself,  
465 these haplotypes only shared 68.4% genetic identity. We wanted to determine whether the value  
466 might be higher if we considered the wider region. While investigating putative intraspecific  
467 exchange, Debortoli et al. (2016) sequenced a longer (10.8kb) region surrounding EPIC25 Hap10 for  
468 two other individuals in Species C (42 and 51). The region containing the genes *MTSS1* and *HADBH*  
469 was syntenic with the *A. vaga* reference genome. To determine homology, we would ideally align  
470 this extended region with its counterpart in Species E, but no sequenced genome for E is available.  
471 However, the reference genome clone of *A. vaga* ("AD008") happens to be very closely related to  
472 Species E (Figure 3). In fact, homology to Hap10 [C] at the EPIC25 marker is identical (68.4%) for  
473 Hap37 [E] and AD008. We compared the equivalent identities at all five available loci, and in each  
474 case, the homology to Species C was nearly identical for Species E and the *A. vaga* reference genome

475 (Table S3). This coincidence enabled us to use the *A. vaga* reference genome as a surrogate for  
476 Species E, with some confidence that the results would reflect the relationship to Species C.

477

478 We aligned the sequenced EPIC25 region from Individual 42 [C] (GenBank: KU861136.1) against the  
479 matching region from the reference genome (Assembly GCA\_000513175.1) using MAFFT as  
480 implemented in Geneious, with default settings. For clarity, we delineated a focal region from the  
481 stop codon of *MTSS1* to the stop codon of *HADBH* (8949bp, approximately centred on EPIC25). This  
482 included exons and introns from both complete genes, and the intergenic region. We then  
483 measured the pairwise identity between the species for a variety of subregions (Table S4).

484

485 The homology between these species for the whole region is 62.3%, which is less than the estimate  
486 based on the EPIC25 marker. The intergenic region is very divergent (52.4%), but even if we only  
487 compare genes, the values are either lower than the estimate from the EPIC25 marker (for *HADBH*),  
488 or identical to it (for *MTSS1*). Thus, we can reject the hypothesis that the marker-based identities in  
489 Table 2 underestimate the homology between species for broader genomic regions. The distances  
490 involved would remain incompatible with interspecific recombination even if we only looked at  
491 discontinuous exons, whose identity was 75.1% for *MTSS1*. This is nearly the same as the mean  
492 identity between independently evolving ohnologs in the reference genome (74.8%, Flot et al. 2013).

493

### 494 **6.3 Methods for microhomology analysis**

495

496 Mechanisms of interspecific recombination based on overall homology seem to be excluded for the  
497 sequence pairs we considered, which have equal or lower identities than independently evolving  
498 ohnologs within the same genomes. However, we also considered alternative mechanisms with less  
499 stringent identity requirements than HR (N. Debortoli, J.-F. Flot, K. Van Doninck, pers. comm). One  
500 example is homology-facilitated illegitimate recombination (HFID), in which "single regions of high  
501 nucleotide-sequence similarity (~200 bp in length)...initiate recombination events that lead to the  
502 additive integration of >1000-bp-long heterologous DNA fragments" (Thomas & Nielsen 2005).  
503 Another is microhomology-mediated end joining (MMEJ), whose "foremost distinguishing property...  
504 is the use of 5-25bp microhomologous sequences during the alignment of broken ends before  
505 joining" (McVey & Lee 2008). If interspecifically transferred sequences share longer or more frequent  
506 mismatch-free blocks than genomic ohnologs (Vulić et al. 1997), then HFID or MMEJ may explain how  
507 they undergo frequent exchange while ohnologs with higher global homology evolve independently.

508



509 To test this hypothesis, we estimated the length and frequency of microhomologous blocks for genes  
510 surrounding the putative transfer seen in Sample B22, between EPIC25 Hap10 [C] and Hap37 [E]. As  
511 above, we used the genome reference clone for *A. vaga* (AD008) as a surrogate for Species E (Table  
512 S3). At every scale from 1-40bp, we compared interspecific microhomology for *MTSS1-A* and *HADBH*  
513 with intragenomic microhomology for 7650 ohnologous pairs of genes in the *A. vaga* reference  
514 genome. As an important point of comparison, we highlighted the microhomology between *MTSS1-*  
515 *A* and its own genomic ohnolog (*MTSS1-B*), which contains the EPIC63 marker. Debortoli et al.  
516 (2016) implicitly assume there is no exchange between these highly divergent genes, which were  
517 treated as "independent nuclear markers" and sequenced with "ohnologue-specific" primers.

518

519 Gene models for *A. vaga* were constructed using BRAKER (Hoff et al. 2015), with RNASeq as evidence  
520 (SRA accession: ERR260376; Flot et al. 2013). Collinear regions were identified using MCScanX (Wang  
521 et al. 2012), setting the maximum number of allowed gaps between collinear genes to 10. Between  
522 all pairs of collinear genes, synonymous ( $K_S$ ) and nonsynonymous ( $K_A$ ) divergences were calculated  
523 using the method of Nei & Gojobori (1986), implemented in BioPerl (Stajich et al. 2002). Ohnologs  
524 were defined as pairs of genes within collinear regions with  $K_S \geq 0.5$  ( $n = 7,650$ ). Ohnologous regions  
525 (comprising exons plus introns) were extracted and aligned using MAFFT (Kato & Standley 2013)  
526 with default settings. Introns were included because interspecific recombination was claimed for  
527 intronic markers, and any inter-ohnolog recombination facilitated by microhomology would involve  
528 unspliced genomic DNA. Microhomology across all 7,650 alignments was calculated with a custom  
529 Perl script, using a sliding window along each alignment (sliding one base each iteration), from a size  
530 of one to 40 bp, counting any window of exact identity as a match. The number of identical blocks  
531 was scaled relative to alignment length to account for gene size, and multiplied by 1,000 to give a  
532 per-kb estimate. All scripts are available at <https://github.com/reubwn/microhomology>. The same  
533 method was used to measure microhomology between Species C and *A. vaga* for the alignments of  
534 *MTSS1-A* and *HADBH* discussed above. Finally, we highlighted the specific microhomology curve in  
535 *A. vaga* corresponding to the pairing between *MTSS1-A* and its ohnolog, *MTSS1-B*.

536

537 Gene copies involved in putative interspecific recombination did not share significantly more or  
538 longer blocks of microhomology than independently evolving ohnologs in the same genomes, at any  
539 scale from one to 40bp (Figure S9). At most scales they even shared less microhomology with the  
540 "donor species" than with their own ohnologs. Microhomology-based mechanisms such as MMEJ  
541 and HFIR could not facilitate distant interspecific recombination and yet fail to permit exchange

542 between ohnologs with even more extensive microhomology, especially as conspecific DNA  
543 fragments seem likely to be more abundant and available than heterospecific ones.

544

545 Other mechanisms of homology recognition seem even less applicable. For instance, pairing of  
546 chromosomes in early meiosis appears to be independent of recombination in some cases (Da Ines  
547 et al. 2014), but this involves chromosome-scale features such as centromeres and telomeres, which  
548 are not shared by loose DNA fragments. Pairing must still be stabilised by recombination, via  
549 sequence-dependent pathways. Another recognition mechanism involves homologous trinucleotide  
550 repeats interspersed at a specific periodicity within otherwise divergent sequences (Gladyshev &  
551 Kleckner 2016), but there is no evidence for this distinctive architecture in the putatively exchanged  
552 sequences we examined, and that pathway is not linked to recombination. It seems improbable  
553 *prima facie* that any mechanism could enable ready exchange of DNA across species boundaries,  
554 while simultaneously precluding exchange between less divergent ohnologs within the same  
555 genomes. We suggest that any argument to the contrary must bear the burden of proof.

556

## 557 **7.0 Quantitative evaluation of evidence for "intraspecific DNA exchanges"**

558

559 Using the same set of tubes, Debortoli et al. (2016) reported genetic and genomic evidence for three  
560 "haplotype trios" that they claim "can only be explained by recombination between individuals". As  
561 outlined in the main text, there is a very high probability that such patterns correspond to cross-  
562 contamination involving animals belonging to the same species. Some trios are explained even more  
563 parsimoniously "by mutations and gene conversions alone", as the authors anticipated.

564

### 565 **7.1 Calculating the number of tubes expected to show conspecific DNA contamination**

566

567 Debortoli et al. (2016) report three intraspecific "haplotype trios" at nuclear PCR markers that they  
568 interpret as "signatures of genetic exchange": two in Species A and one in Species C. Each involves a  
569 set of tubes interpreted as a trio of heterozygous individuals that appear to share alleles "in a cyclic  
570 fashion...(a|b), (b|c), and (c|a)". However, Table S5 illustrates multiple ways to generate such a  
571 pattern when tubes are cross-contaminated with DNA from two conspecific animals. As seen for  
572 "interspecific" samples, contamination may either involve genomic DNA, or amplified fragments  
573 bearing the focal locus. In the simplest case, three tubes would need to contain DNA from two  
574 animals in order to explain all three "haplotype trios" reported in the dataset. The Nu1054 trio in  
575 Species A can be completed either by Sample H3-03 ("Individual 11") or HB01 ("Individual 13"), and

576 the latter also completes the EPIC25 trio. Contamination of these two tubes would parsimoniously  
577 explain both Species A trios, with one more contamination required in Species C, for a total of three.

578

579 The number of tubes expected to contain DNA from two conspecific animals can be calculated using  
580 two pieces of information. First, we need the proportion of tubes containing DNA from two animals  
581 of different species. We conservatively limit this value to the six tubes identified in Table 1. The true  
582 value is certainly higher, given observations about samples such as A3B1 (see Section 5.4), but  
583 ConTAMPR was only applied formally to those six. Some tubes contained DNA from three different  
584 animals, and thus represent two separate contamination events each, but we conservatively treat  
585 these the same way as tubes with a single contamination. We also need to know the relative  
586 frequencies of animals from each of the focal species in the sampled material. These are retrieved  
587 from Table S2 of Debortoli et al., based on a suitably large sample (576 animals). All putative inter-  
588 and intraspecific genetic exchanges involved Species A, C and E, so we can omit Species B, D and F  
589 from consideration. We therefore take the heterospecific contamination rate to be 6 tubes out of  
590 72, and the relative ratio of animals from Species A, C and E to be 130 : 396 : 21.

591

592 Let  $t$  be the probability that DNA from two individual animals was accidentally introduced to any  
593 given tube. The number of contaminated tubes in the A/C/E dataset is therefore  $72t$ . Let us assume  
594 the two animals in each tube-sharing pair were drawn at random from the population as a whole.  
595 This conservative assumption is discussed later, but it enables us to populate a table of probabilities  
596 from the species ratios above (Table S6). Using this table, we can compute the expected number of  
597 conspecific contamination events given that six heterospecific contamination events are observed,  
598 as well as  $t$  itself. The calculated proportion of conspecific contamination events is 0.58206 and  $t$  is  
599 0.199; thus, 8 tubes are expected to show conspecific contamination. The binomial distribution can  
600 be applied to calculate 95% confidence intervals for this estimate (4 - 15 tubes). The probability that  
601 at least three tubes show conspecific cross-contamination is 0.99267.

602

603 To estimate the probability that conspecific contamination occurred in one or more tubes assigned  
604 to Species C, we used the binomial distribution and Table S6 to calculate the cumulative probability  
605 that one or more of the 72 tubes experienced conspecific cross-contamination at all (0.99987). We  
606 then calculated the probability that there was exactly one such event, and that this event involved  
607 two animals belonging to Species A ( $0.00126 \times 0.09728 = 0.00012$ ). The probability of this case was  
608 deducted from the initial probability ( $0.99987 - 0.00012 = 0.99975$ ). The case of exactly one event  
609 involving two animals from Species E ( $P = 3.2 \times 10^{-6}$ ) can be ignored, as can the case of two or more

610 conspecific contamination events all involving Species A or E pairs ( $P = 5.6 \times 10^{-5}$ ). This leaves a  
611 99.98% probability that at least one sample interpreted as a Species C rotifer in fact contained DNA  
612 from two such animals. The most likely number of cases is 7 (95% C.I. 4-14).

613

614 These calculations make the highly conservative assumption that the species identities of any pair of  
615 rotifers in a tube are drawn randomly from the sampled population. In fact, Debortoli et al. (2016)  
616 explicitly falsify this assumption empirically in their Table S4, by demonstrating far lower odds that a  
617 pair of rotifers sampled from the same patch belong to the same molecular species versus different  
618 species. Thus, conspecific contamination is even more common than we report here. Debortoli et al.  
619 calculate an odds ratio of 11 (95% C.I. 8-16;  $P < 2.2 \times 10^{-16}$ ), which suggests we may have dramatically  
620 underestimated the rate of conspecific cross-contamination and the total fraction of contaminated  
621 tubes ( $t$ ). This consideration places the reliability of the 2016 dataset even further into doubt. Much  
622 of the apparent heterozygosity in *Adineta* "individuals" may well arise from two conspecific animals  
623 or their DNA sharing a sample tube. Computational phasing of chromatograms is unreliable if two or  
624 more animals (and thus four or more alleles) are present in a substantial fraction of tubes.

625

626 Conspecific contamination would be difficult to exclude empirically even using high-quality genome  
627 data, much less the "extremely fragmented" genome assemblies of Debortoli et al., where "coverage  
628 was highly heterogeneous due to the whole-genome amplification step conducted prior to library  
629 preparation". It is perhaps unsurprising "the posterior probabilities of our haplotypes reconstructed  
630 using PHASE were rather low", given that a substantial fraction of both the genomic and population  
631 reference samples are likely to contain DNA from multiple animals, and therefore more than two  
632 homologous sequences. The authors "did not detect any additional copy of the EPIC25, EPIC63, and  
633 Nu1054 markers, nor any additional 28S rDNA sequence", but this is not predicted even if conspecific  
634 contamination is present, for several reasons. First, phasing algorithms assume only two haplotypes  
635 are to be computed per individual. Second, even if more haplotypes were permitted, the Species C  
636 population lacks diversity at these loci (e.g. all sampled individuals share 28S Hap5 and/or Hap6).  
637 Third, even given higher diversity, we have shown that contamination often involves amplification of  
638 loose DNA at a single locus, with no evidence of corresponding haplotypes at other loci; thus, the  
639 scenarios in Table S5 do not predict or require three or more haplotypes at other loci.

640

## 641 **7.2 Minimum numbers of mutations and gene conversions to explain "haplotype trios"**

642

643 Debortoli et al. (2016) discuss two "haplotype trios" involving Species A, at the Nu1054 and EPIC25  
644 markers. These are interpreted as evidence of "intraspecific horizontal exchange" that "can only be  
645 explained by recombination between individuals". As discussed above, we calculated probabilities in  
646 excess of 99% that conspecific contamination occurred sufficiently often to explain such evidence.  
647 For these two trios, however, we need not even reach that hypothesis. The authors rightly note that  
648 patterns of allele sharing involving closely related clones and sequences "may be explained by  
649 mutations and gene conversions alone". However, they do not explicitly or quantitatively test this  
650 hypothesis for either of the trios discussed before reaching their conclusions. To supply the missing  
651 test, we obtained the relevant sequences for the samples comprising each trio from GenBank (Figure  
652 S10). For Species A, the identities of the samples are not clear from the haplotype networks the  
653 authors present in their Figure 3, but can be inferred by examining the codes in their Table S3 and  
654 the sequences themselves. For the purpose of this analysis, we assume Debortoli et al. phased the  
655 homologues correctly, setting aside the substantial concerns about phasing described above.

656

657 To visualise each trio explicitly, we aligned the six sequences and identified every polymorphic site  
658 differentiating the three haplotypes (Figure S10). For the EPIC25 trio, Debortoli et al. state that  
659 "flanking regions were sequenced...yielding five additional SNPs between haplotypes". This seems  
660 to be an error, as examination of the flanking sequences reveals only two additional C/T SNPs, for a  
661 total of 3 SNPs and one tandem repeat polymorphism. From each alignment, we stripped out the  
662 polymorphic sites defining each haplotype, and matched them to the samples comprising the trio.  
663 This gives a pair of sequences for each sample, interpreted as a single animal with two homologous  
664 sequences. These were plotted to identify ways in which each trio "may be explained by mutations  
665 and gene conversions alone". We began with two haplotypes from a single animal, and attempted to  
666 identify the most parsimonious pathway to generate the other two clones by substitution.

667

668 For the Nu1054 trio, the simplest path identified was a single point mutation in one descendant of  
669 the initial clone, and a single gene conversion event in a different descendant, with a tract length of  
670 150bp (Figure S10). Evidence of both substitution events is seen commonly in other individuals from  
671 the population sample. For the EPIC25 trio, the simplest hypothesis is a single point mutation in one  
672 descendant of the focal clone, and a single gene conversion in another, with a tract length of 274bp  
673 (Figure S10). These hypotheses are extremely parsimonious: in Species A, all but one of the Nu1054  
674 and EPIC25 haplotypes (93%) are separated from a second allele by a single substitution, indicating  
675 that point mutations are common and frequently persist. Gene conversion is even more common: in  
676 *Adineta*, "the probability that a given base in the genome experiences gene conversion is at least

677 one order of magnitude greater than its probability to mutate" (Flot et al. 2013). The lengths of the  
678 two hypothetical gene conversion events are well within the mean tract length determined in model  
679 systems, including *Plasmodium*, yeast, humans and *Drosophila* (Do et al. 2014; Yim et al. 2014;  
680 Williams et al. 2015; Miles et al. 2016). We therefore find that both haplotype trios in Species A  
681 "may be explained by mutations and gene conversions alone", without reference to "intraspecific  
682 horizontal exchange" or even to probable conspecific cross-contamination.

683

684 For completeness, we applied the same method to the EPIC25 trio in Species C (KU861135-40). The  
685 600bp tract of exact allele-sharing occurs precisely at the EPIC25 marker, and ceases 100bp beyond  
686 it, where the three haplotypes split into six, and undetermined bases start to interrupt the assembly.  
687 At the EPIC25 marker, any pair of genotypes can be interchanged via one gene conversion (231 bp)  
688 and three point mutation events (not shown), so it is not improbable for any two clones to arise "by  
689 mutations and gene conversions alone". For the full trio, however, the shortest pathway requires  
690 two gene conversions and six point mutations. Debortoli et al. consider this "unlikely", although that  
691 assessment must be weighed against the even more extraordinary claim of "intraspecific horizontal  
692 exchange". Cross-contamination is a much more parsimonious explanation than either of these  
693 alternatives, as there is a 99.98% probability that one or more Species C tubes contained DNA from  
694 two rotifers. Specifically, the EPIC25 Hap6-Hap14 genotype in Sample H4-28 is found nowhere else  
695 in the study, and therefore is the pairing most likely to be an artefact. As seen in Table S5, this  
696 genotype will arise if a single animal homozygous for Hap6 (e.g. Individual 30) shares a tube with  
697 DNA from an individual homozygous for EPIC25 Hap14, or a loose DNA fragment bearing Hap14.

698

699 We recommend that future attempts to test for recombination in presumed asexuals ought to take  
700 explicit and quantitative account of alternative hypotheses for apparent allele-sharing, including  
701 cross-contamination, point mutation, gene conversion, convergent substitution, natural selection,  
702 phasing uncertainty, multiple gene copies, sequencing error, and the null probability of identifying  
703 haplotype trios or other patterns *post-hoc*, given the numbers of isolates or genotypes examined in  
704 an initial sample pool. One way to exclude these alternative hypotheses would be a direct  
705 demonstration of recombination or sexual crossing between individuals or clones in the laboratory.

706

707

708

709

710

711 **Supplemental References**

712

713 1. Agresti, A. (2007). *An introduction to categorical data analysis*. 2nd edn. John Wiley & Sons, Inc.,  
714 Hoboken, New Jersey

715

716 2. Barron, G. (2004). Fungal parasites and predators of rotifers, nematodes, and other invertebrates.  
717 In: *Biodiversity of fungi: inventory and monitoring methods* (eds. Mueller, G.M., Bills, G.F. & Foster,  
718 M.S.). Elsevier Academic Press, San Diego, pp. 435–450

719

720 3. Debortoli, N., Li, X., Eyres, I., Fontaneto, D., Hespels, B., Tang, C.Q., *et al.* (2016). Genetic  
721 exchange among bdelloid rotifers is more likely due to horizontal gene transfer than to meiotic sex.  
722 *Curr. Biol.*, 26, 723–732

723

724 4. Do, A.T., Brooks, J.T., Le Neveu, M.K. & LaRocque, J.R. (2014). Double-strand break repair assays  
725 determine pathway choice and structure of gene conversion events in *Drosophila melanogaster*. *G3*  
726 *Genes/Genomes/Genetics*, 4, 425–432

727

728 5. Ewing, B. & Green, P. (1998). Base-calling of automated sequencer traces using phred. II. Error  
729 probabilities. *Genome Res.*, 8, 186–194

730

731 6. Flot, J., Hespels, B., Li, X., Noel, B., Arkhipova, I., Danchin, E.G.J., *et al.* (2013). Genomic evidence  
732 for ameiotic evolution in the bdelloid rotifer *Adineta vaga*. *Nature*, 500, 453–457

733

734 7. Folmer, O., Black, M., Hoeh, W., Lutz, R. & Vrijenhoek, R. (1994). DNA primers for amplification of  
735 mitochondrial cytochrome c oxidase subunit I from diverse metazoan invertebrates. *Mol. Mar. Biol.*  
736 *Biotechnol.*, 3, 294–299

737

738 8. Gladyshev, E. & Kleckner, N. (2016). Recombination-independent recognition of DNA homology  
739 for repeat-induced point mutation (RIP) is modulated by the underlying nucleotide sequence. *PLoS*  
740 *Genet.*, 12, e1006015

741

742 9. Han, T., Chang, C.-W., Kwekel, J.C., Chen, Y., Ge, Y., Martinez-Murillo, F., *et al.* (2012).

743 Characterization of whole genome amplified (WGA) DNA for use in genotyping assay development.

744 *BMC Genomics*, 13, 217

- 745
- 746 10. Hoff, K.J., Lange, S., Lomsadze, A., Borodovsky, M. & Stanke, M. (2015). BRAKER1: Unsupervised  
747 RNA-Seq-based genome annotation with GeneMark-ET and AUGUSTUS. *Bioinformatics*, 32, 767–769  
748
- 749 11. Da Ines, O., Gallego, M.E. & White, C.I. (2014). Recombination-independent mechanisms and  
750 pairing of homologous chromosomes during meiosis in plants. *Mol. Plant*, 7, 492–501  
751
- 752 12. Katoh, K., Asimenos, G. & Toh, H. (2009). Multiple alignment of DNA sequences with MAFFT.  
753 *Methods Mol. Biol.*, 537, 39–64  
754
- 755 13. Katoh, K. & Standley, D.M. (2013). MAFFT multiple sequence alignment software version 7:  
756 Improvements in performance and usability. *Mol. Biol. Evol.*, 30, 772–780  
757
- 758 14. Kearse, M., Moir, R., Wilson, A., Stones-Havas, S., Cheung, M., Sturrock, S., *et al.* (2012).  
759 Geneious Basic: An integrated and extendable desktop software platform for the organization and  
760 analysis of sequence data. *Bioinformatics*, 28, 1647–1649  
761
- 762 15. Larosa, V. & Remacle, C. (2013). Transformation of the mitochondrial genome. *Int. J. Dev. Biol.*,  
763 57, 659–665  
764
- 765 16. Mark Welch, J.L. & Meselson, M. (1998). Karyotypes of bdelloid rotifers from three families.  
766 *Hydrobiologia*, 387, 403–407  
767
- 768 17. McVey, M. & Lee, S.E. (2008). MMEJ repair of double-strand breaks (director’s cut): deleted  
769 sequences and alternative endings. *Trends Genet.*, 24, 529–538  
770
- 771 18. Miles, A., Iqbal, Z., Vauterin, P., Pearson, R., Campino, S., Theron, M., *et al.* (2016). Indels,  
772 structural variation, and recombination drive genomic diversity in *Plasmodium falciparum*. *Genome*  
773 *Res.*, 26, 1288–1299  
774
- 775 19. Mullis, K.B., Ferre, F. & Gibbs, R.A. (1994). *The polymerase chain reaction*. Birkhäuser, Boston  
776
- 777 20. Nei, M. & Gojobori, T. (1986). Simple methods for estimating the numbers of synonymous and  
778 nonsynonymous nucleotide substitutions. *Mol. Biol. Evol.*, 3, 418–426



779  
780  
781  
782  
783  
784  
785  
786  
787  
788  
789  
790  
791  
792  
793  
794  
795  
796  
797  
798  
799  
800  
801  
802  
803  
804  
805  
806  
807  
808  
809  
810  
811  
812

21. Polz, M.F. & Cavanaugh, C.M. (1998). Bias in template-to product ratios in multitemplate PCR. *Appl. Environ. Microbiol.*, 64, 3724–3730

22. Stajich, J.E., Block, D., Boulez, K., Brenner, S.E., Chervitz, S.A., Dagdigian, C., *et al.* (2002). The Bioperl toolkit: Perl modules for the life sciences. *Genome Res.*, 12, 1611–1618

23. Thomas, C.M. & Nielsen, K.M. (2005). Mechanisms of, and barriers to, horizontal gene transfer between bacteria. *Nat. Rev. Microbiol.*, 3, 711–721

24. Vulić, M., Dionisio, F., Taddei, F. & Radman, M. (1997). Molecular keys to speciation: DNA polymorphism and the control of genetic exchange in enterobacteria. *Proc. Natl. Acad. Sci. U. S. A.*, 94, 9763–7

25. Wang, Y., Tang, H., Debarry, J.D., Tan, X., Li, J., Wang, X., *et al.* (2012). MCScanX: A toolkit for detection and evolutionary analysis of gene synteny and collinearity. *Nucleic Acids Res.*, 40, e49

26. Williams, A.L., Genovese, G., Dyer, T., Altemose, N., Truax, K., Jun, G., *et al.* (2015). Non-crossover gene conversions show strong GC bias and unexpected clustering in humans. *Elife*, 4, 1–21

27. Wilson, C.G. & Sherman, P.W. (2010). Anciently asexual bdelloid rotifers escape lethal fungal parasites by drying up and blowing away. *Science*, 327, 574–576

28. Yim, E., O’Connell, K.E., St Charles, J. & Petes, T.D. (2014). High-resolution mapping of two types of spontaneous mitotic gene conversion events in *Saccharomyces cerevisiae*. *Genetics*, 198, 181–192

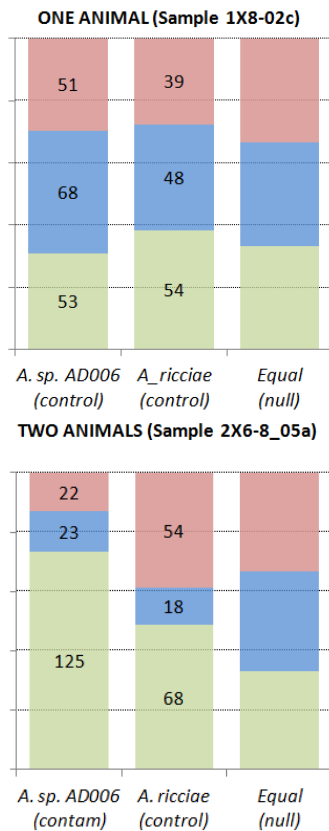

813 **Figure S1.** Minority peak analysis of mtCO1 chromatograms for two samples where *A. vaga* (AD008)  
 814 was in the majority. In the first sample, *A. vaga* was the only rotifer present, and the fit of minority  
 815 peaks to other haplotypes did not differ significantly from the null expectation. In the second  
 816 sample, another rotifer belonging to *Adineta* sp. (AD006) was present, and minority peaks  
 817 corresponding to this known contaminant were a significantly better fit than the null expectation  
 818 ( $\chi^2=123.61$ , d.f. = 2,  $P < 2.2 \times 10^{-16}$ ), or a control species, *A. ricciae* ( $\chi^2=28.28$ , d.f. =2,  $P = 7.23 \times 10^{-7}$ ).

819  
820

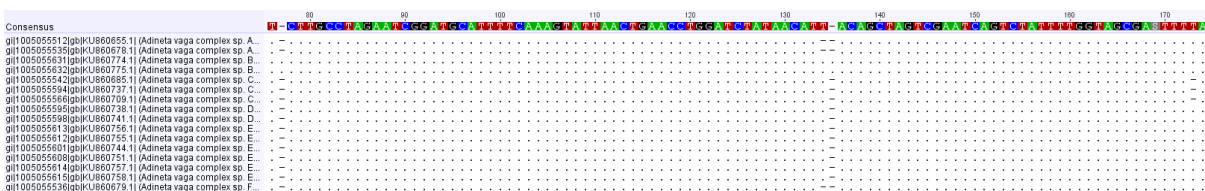

821 **Figure S2.** Insertion-deletion polymorphisms in an alignment of 28S ribosomal DNA sequences for  
 822 the six *Adineta* species reported by Debortoli et al. (2016). Dots indicate agreement to the  
 823 consensus sequence; dashes indicate gaps. Minority and majority sequences of different lengths are  
 824 predicted to run out of phase in chromatograms for part of their length.

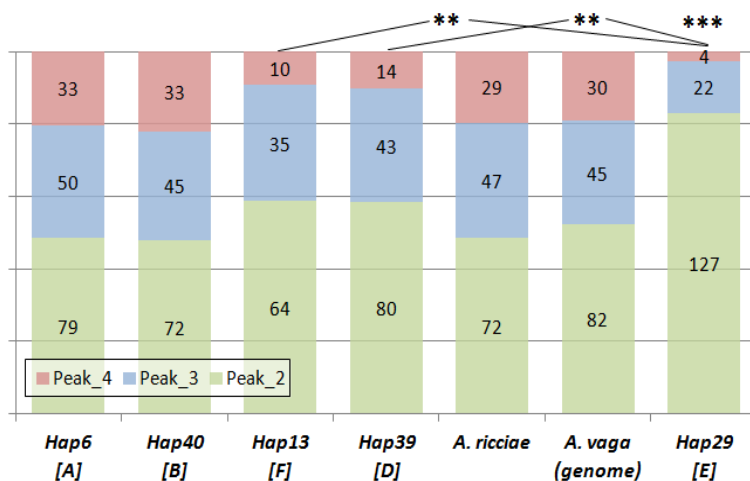

825 **Figure S3.** Summary of minority peaks in mtCO1 chromatograms for Sample B22. The fit of Hap29  
 826 [E] is significantly better (\*\*\*) than the other six species ( $\chi^2=69.49$ , d.f. = 12,  $P = 3.99 \times 10^{-10}$ ). If  
 827 Hap29 [E] is removed, the other distributions are not significantly different from one another  
 828 ( $\chi^2=15.2$ , d.f. = 10,  $P = 0.124$ ). If compared directly, Hap29 [E] is a significantly better fit (\*\*)  
 829 either Hap13 [F] ( $\chi^2=19.48$ , d.f. = 2,  $P = 5.9 \times 10^{-5}$ ) or Hap 39 [D] ( $\chi^2=22.2$ , d.f. = 2,  $P = 1.51 \times 10^{-5}$ ).  
 830

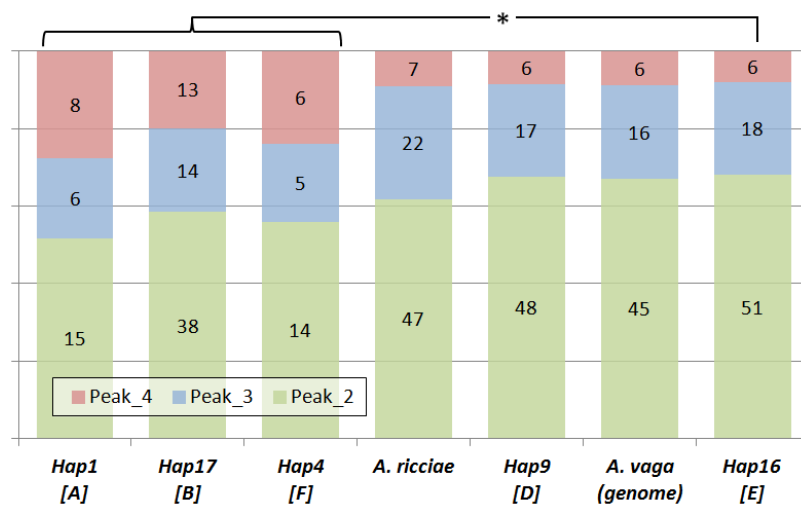

831 **Figure S4.** Summary of minority peaks in 28S chromatograms for Sample B22. Hap 16 [E] is a  
 832 significantly better fit to these peaks (\*) than Hap1 [A], Hap 17 [B] and Hap4 [E], which were pooled  
 833 owing to small cell counts ( $\chi^2=6.85$ , d.f. = 2,  $P = 0.029$ ). The remaining species are too closely  
 834 related to Species E to be distinguished statistically at the conserved 28S locus.  
 835

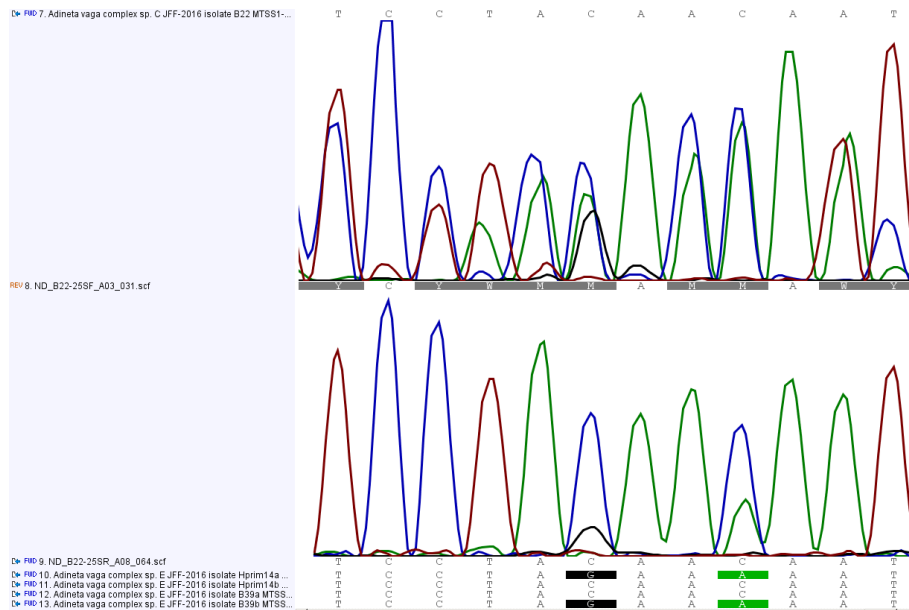

836 **Figure S5.** Shifted and double peaks in EPIC25 chromatograms for Sample B22 indicate indels and  
 837 SNPs between two homologous sequences, which both belong to Species E and are incongruent with  
 838 the Species C background. The two SNPs shown here correspond to polymorphisms seen natively in  
 839 "heterozygous" animals from the Species E population (Hprim14a/b and B39a/b). Horizontal import  
 840 of standing heterozygosity is not predicted in the model of interspecific recombination presented by  
 841 Debortoli et al. (2016), but it is predicted if the sequences arise from cross-contamination.  
 842

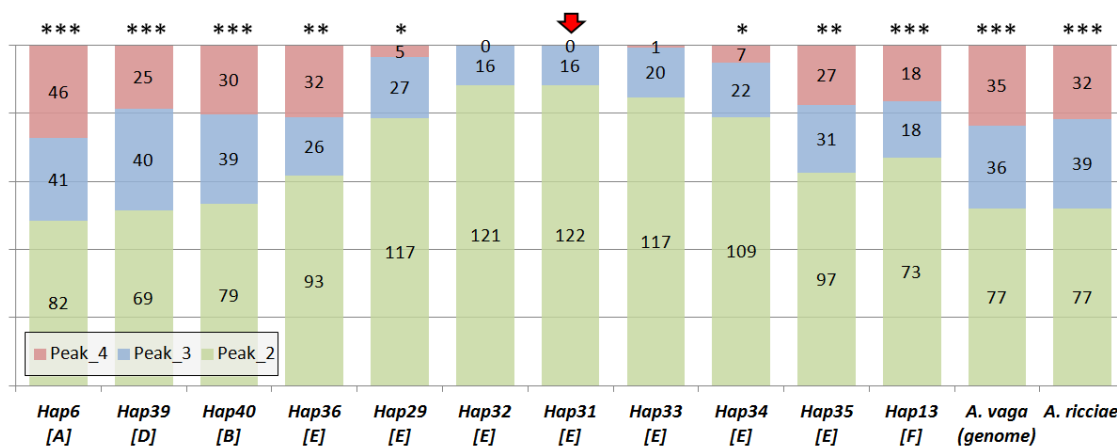

843 **Figure S6.** Minority peaks in mtCO1 chromatograms for Sample B39 (Individual 66) indicate the  
 844 predicted 'native' haplotype Hap31 [E] (red arrow), and challenge the hypothesis that mtDNA has  
 845 undergone interspecific recombination. Hap31 [E] is a significantly better match to the secondary  
 846 peaks than all other haplotypes (\*:  $\chi^2 = 9.63$ , d.f. = 4,  $P = 0.047$ ; \*\*:  $\chi^2 = 66.71$ , d.f. = 8,  $P = 2.21 \times 10^{-11}$ ;  
 847 \*\*\*:  $\chi^2 = 136$ , d.f. = 20,  $P < 2.2 \times 10^{-16}$ ), except Hap32 [E] and Hap33 [E], which are nearly identical and  
 848 were not included in contingency table tests.

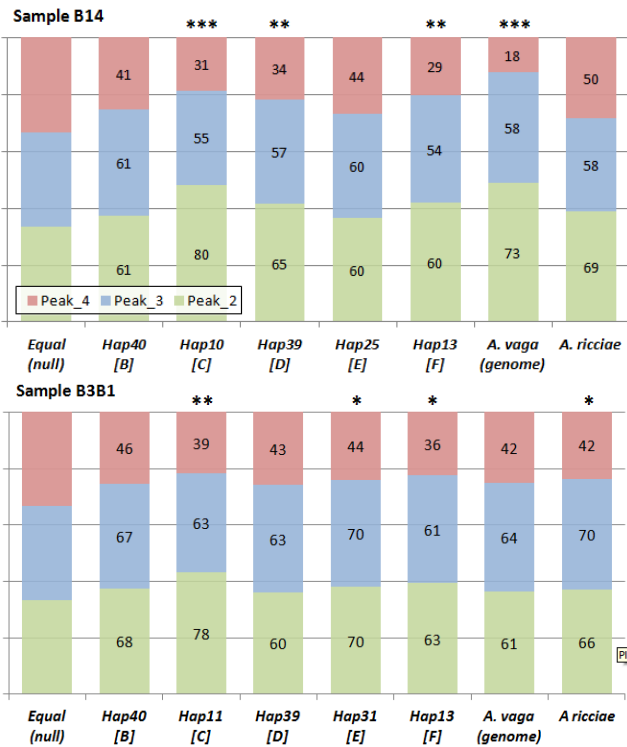

849 **Figure S7.** Analysis of minority peak distributions indicates additional mtCO1 sequences in  
 850 chromatograms for Samples B14 and B3B1. Multiple candidate haplotypes are a significantly better  
 851 fit than expected under a null distribution of peak ranks (\*\*\* :  $P < 0.001$ , \*\*:  $P < 0.01$ ; \*:  $P < 0.05$ ),  
 852 but their distributions do not differ significantly when compared with each other, and we cannot  
 853 therefore narrow down a single minority haplotype driving the pattern. This suggests two different  
 854 contaminating sequences are superimposed in each case, alongside the Species A majority  
 855 haplotype. Clear evidence for haplotypes from Species A, C and E was found at other loci.  
 856

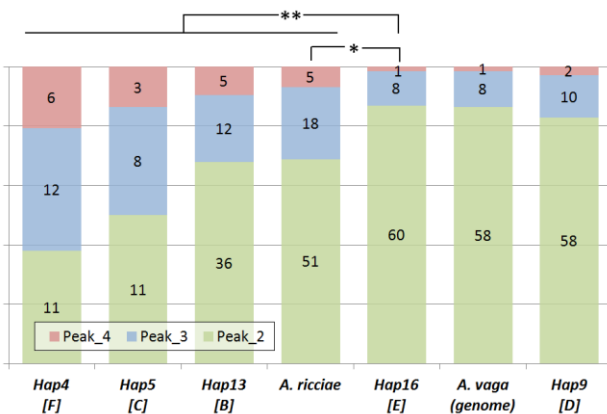

857 **Figure S8.** Minority peaks in 28S chromatograms for Sample B14 reveal a second haplotype that fits  
 858 Species E significantly better than Species B, C, F or *A. ricciae* (\*\*:  $\chi^2 = 28.77$ , d.f. = 8,  $P = 3.0 \times 10^{-4}$ ; \* :  
 859  $\chi^2 = 7.1$ , d.f. = 2,  $P = 0.029$ ). Hap9 [D] and *A. vaga* (genome) are nearly identical to Hap16 [E] and  
 860 cannot be distinguished statistically.

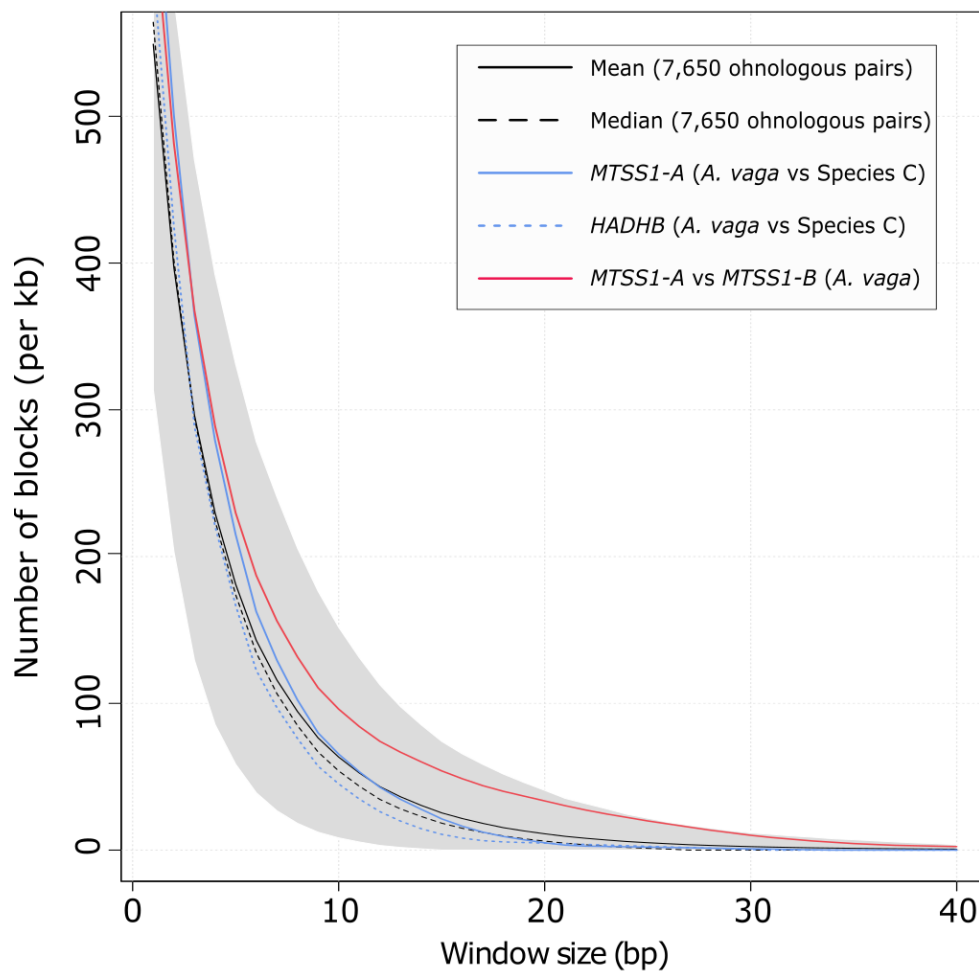

861 **Figure S9.** Two genes linked to an "interspecific horizontal genetic transfer" event did not share  
 862 significantly more or longer microhomologous blocks than 7650 pairs of independently evolving  
 863 ohnologous genes in the *A. vaga* reference genome. Regardless of scale (1-40bp), the degree of  
 864 microhomology between "transferred" sequences (blue lines) falls within the 5% and 95% quantiles  
 865 for genomic ohnologs (grey shading). The dashed blue line represents the gene *MTSS1-A*, containing  
 866 the EPIC25 marker; the solid blue line shows the next-closest gene (*HADHB*). For sliding windows  
 867 above 3bp, the "horizontally transferred" *MTSS1-A* sequences share less microhomology with each  
 868 other than with their own independently evolving ohnolog (*MTSS1-B*) in the same genome (red line).  
 869  
 870  
 871  
 872  
 873  
 874

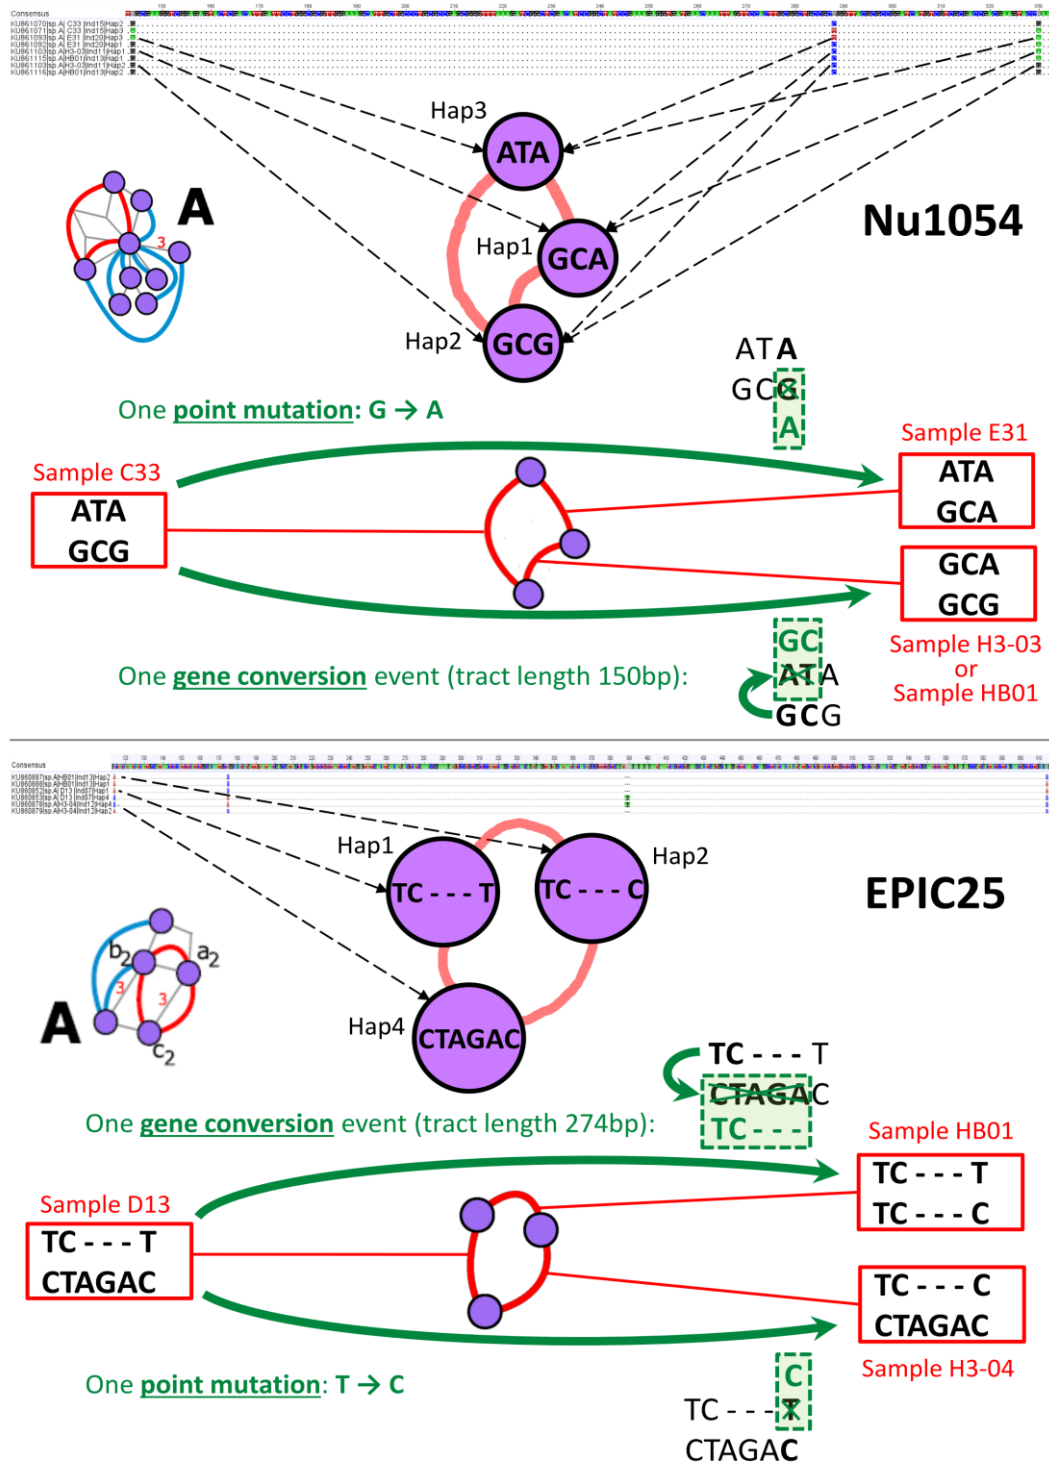

875 **Figure S10.** Debortoli et al. (2016) assert that "haplotype trios" at Nu1054 and EPIC25 "can only be  
 876 explained by recombination between individuals" in Species A. This figure illustrates the alternative  
 877 hypothesis that the trios "may be explained by mutations and gene conversions alone". All variable  
 878 sites are stripped from alignments of the focal sequences and mapped to haplotypes (purple circles).  
 879 Homologous sequence pairs are then matched to samples (in red). Both trios are parsimoniously  
 880 explained by one point mutation and one gene conversion arising in a single clone (green arrows).

| Group name            | 1X6                    | 1X8                    | 2X6-8                               |
|-----------------------|------------------------|------------------------|-------------------------------------|
| Animals               | One: AD006             | One: AD008             | Two: AD006 and AD008                |
| Biological replicates | 3                      | 2 (1 lost)             | 6                                   |
| Technical replicates  | 1 triplicate, 2 single | 1 triplicate, 1 single | 1 triplicate, 2 duplicate, 3 single |

881

882 **Table S1.** Design and replication of an experiment to determine the effect of multiple rotifers in a  
883 single DNA extraction tube. AD006: *A. sp.* 'AD006'; AD008: *A. vaga* (reference genome clone).

884

885

| Sample code | Majority haplotype     | Minority haplotype     | Number of chromatogram files | Total bases called | Minority base calls | % sites with majority calls |
|-------------|------------------------|------------------------|------------------------------|--------------------|---------------------|-----------------------------|
| 01          | <i>A. sp.</i> (AD006)  | <i>A. vaga</i> (AD008) | 2 (singleton)                | 1210               | 25                  | 97.94                       |
| 02          | <i>A. vaga</i> (AD008) | <i>A. sp.</i> (AD006)  | 2 (singleton)                | 1210               | 5                   | 99.59                       |
| 03          | <i>A. sp.</i> (AD006)  | <i>A. vaga</i> (AD008) | 4 (duplicated)               | 2420               | 8                   | 99.66                       |
| 04          | <i>A. vaga</i> (AD008) | <i>A. sp.</i> (AD006)  | 2 (singleton)                | 1210               | 6                   | 99.5                        |
| 05          | <i>A. vaga</i> (AD008) | <i>A. sp.</i> (AD006)  | 4 (duplicated)               | 2420               | 16                  | 99.33                       |
| 06          | <i>A. sp.</i> (AD006)  | <i>A. vaga</i> (AD008) | 6 (triplicated)              | 3630               | 13                  | 99.64                       |

886

887 **Table S2.** Summary of base calls from ABI Sanger sequencing of mtCO1, corresponding to majority  
888 and minority haplotypes for biological and technical replicates of experimentally contaminated  
889 samples (Group 2X6-8). Chromatograms are always in bidirectional pairs.

890

891

| Marker | Species C        | Species E        | C vs. E (%) | C vs. ref (%) |
|--------|------------------|------------------|-------------|---------------|
| mtCO1  | Hap10 (KU860596) | Hap29 (KU860588) | 87.8        | 87.8          |
| 28S    | Hap5 (KU860706)  | Hap16 (KU860768) | 97.6        | 97.7          |
| EPIC25 | Hap10 (KU860907) | Hap37 (KU860804) | 68.4        | 68.4          |
| EPIC63 | Hap4 (KU860934)  | Hap34 (KU860927) | 67.4        | 67.6          |
| Nu1054 | Hap16 (KU861061) | Hap21 (KU861052) | 70.1        | 70.2          |

892

893 **Table S3.** At five independent mitochondrial and nuclear marker loci, the percentage identity  
894 between Species C and Species E is almost exactly reproduced by comparing Species C to the  
895 reference genome of *A. vaga*. The reference genome therefore is an appropriate surrogate for  
896 Species E when estimating homology parameters for a hypothetical transfer from Species C.

897

898

899

900



| Comparison              | Aligned length (bp) | Identity (%) |
|-------------------------|---------------------|--------------|
| EPIC25 marker only      | 395                 | 68.4         |
| Two-gene region         | 8949                | 62.3         |
| <i>MTSS1</i> whole gene | 4419                | 68.4         |
| <i>MTSS1</i> exons      | 2301                | 75.1         |
| <i>MTSS1</i> introns    | 2118                | 61.1         |
| Intergenic region       | 2203                | 52.4         |
| <i>HADBH</i> whole gene | 2327                | 60.1         |
| <i>HADBH</i> exons      | 1605                | 67.0         |
| <i>HADBH</i> introns    | 722                 | 44.7         |

901

902 **Table S4.** Pairwise identity between Species C and the *A. vaga* reference genome for the region  
903 surrounding the EPIC25 marker. Regardless of the scope or scale of the comparison, the distances  
904 are not compatible with the "interspecific recombination" claimed between Species C and Species E.  
905 The identity estimate from the short EPIC25 marker accurately reflects (or even overestimates)  
906 homology more broadly.

907

| Number of tubes with DNA from two animals | Tube 1 genotype(s) | Tube 2 genotype(s) | Tube 3 genotype(s) |
|-------------------------------------------|--------------------|--------------------|--------------------|
| 0                                         | (a   b)            | (b   c)            | (c   a)            |
| 1                                         | (a   b)            | (b   c)            | (c   c) & (a   a)  |
| 1                                         | (a   b)            | (b   b) & (c   c)  | (c   a)            |
| 1                                         | (a   a) & (b   b)  | (b   c)            | (c   a)            |
| 2                                         | (a   b)            | (b   b) & (c   c)  | (c   c) & (a   a)  |
| 2                                         | (a   a) & (b   b)  | (b   c)            | (c   c) & (a   a)  |
| 2                                         | (a   a) & (b   b)  | (b   b) & (c   c)  | (c   a)            |
| 3                                         | (a   a) & (b   b)  | (b   b) & (c   c)  | (c   c) & (a   a)  |

908

909 **Table S5.** When tubes are contaminated with DNA from two animals of the same species, there are  
910 at least seven scenarios in which three genotypes at a focal locus (a, b, c) will be shared "in a cyclical  
911 fashion" among tubes, as reported by Debortoli et al. (2016). These scenarios explain such cycles  
912 without reference to "intraspecific horizontal exchange". As discussed for "interspecific" samples,  
913 contamination may be evident at multiple loci, and therefore presumably involves genomic DNA  
914 from two animals (e.g. Sample B11), or only at the focal locus, presumably via amplification of DNA  
915 fragments (e.g. Sample D14).

916

917

918

919

920

921

| First species | P                        | Second species | P       | P (combination) | Contamination category | Sum (P)        |
|---------------|--------------------------|----------------|---------|-----------------|------------------------|----------------|
| A             | $130 \div 547 = 0.23766$ | A              | 0.23766 | 0.05648         | conspecific            |                |
| C             | $396 \div 547 = 0.72395$ | C              | 0.72395 | 0.52410         | conspecific            |                |
| E             | $21 \div 547 = 0.03839$  | E              | 0.03839 | 0.00147         | conspecific            | <b>0.58205</b> |
| A             | 0.23766                  | C              | 0.72395 | 0.17205         | heterospecific         |                |
| A             | 0.23766                  | E              | 0.03839 | 0.00912         | heterospecific         |                |
| C             | 0.72395                  | A              | 0.23766 | 0.17205         | heterospecific         |                |
| C             | 0.72395                  | E              | 0.03839 | 0.02779         | heterospecific         |                |
| E             | 0.03839                  | A              | 0.23766 | 0.00912         | heterospecific         |                |
| E             | 0.03839                  | C              | 0.72395 | 0.02779         | heterospecific         | <b>0.41795</b> |

922

923 **Table S6.** Given the relative frequencies of Species A, C and E in the material sampled by Debortoli  
924 et al. (2016), 0.418 of all cross-contaminated tubes are expected to contain DNA from heterospecific  
925 animals, and 0.582 will contain DNA from conspecific animals. Because heterospecific contamination  
926 is found in 6 of 72 tubes, the number expected to show conspecific contamination is  $6 \times 0.582 \div (1 -$   
927  $0.582) = 8.36 \approx 8$ . The total expected rate of contamination  $t$  is  $(8.36 + 6) \div 72 = 0.199$  (14 tubes),  
928 but this will be dramatically higher if pairs of animals drawn from the same patch are more likely to  
929 belong to the same rather than different species, as demonstrated empirically by Debortoli et al.
